# Supplementary material for: Driving Performance after Bedtime Administration of Daridorexant, Assessed in a Sensitive Simulator
Source: PubMed Central journal article supplement — Clin Pharmacol Ther. 2022 Apr 20;111(6):1334–42. doi: 10.1002/cpt.2592 (PMC9320895; doi:10.1002/cpt.2592), 2022-04-20
Supplement: CPT-111-1334-s004.pdf [file CPT-111-1334-s004.pdf]

**Figure S5.** Scatterplot of daridorexant placebo-corrected SDLP [cm] vs plasma concentration of daridorexant [ng/mL] on Day 2 and Day 5

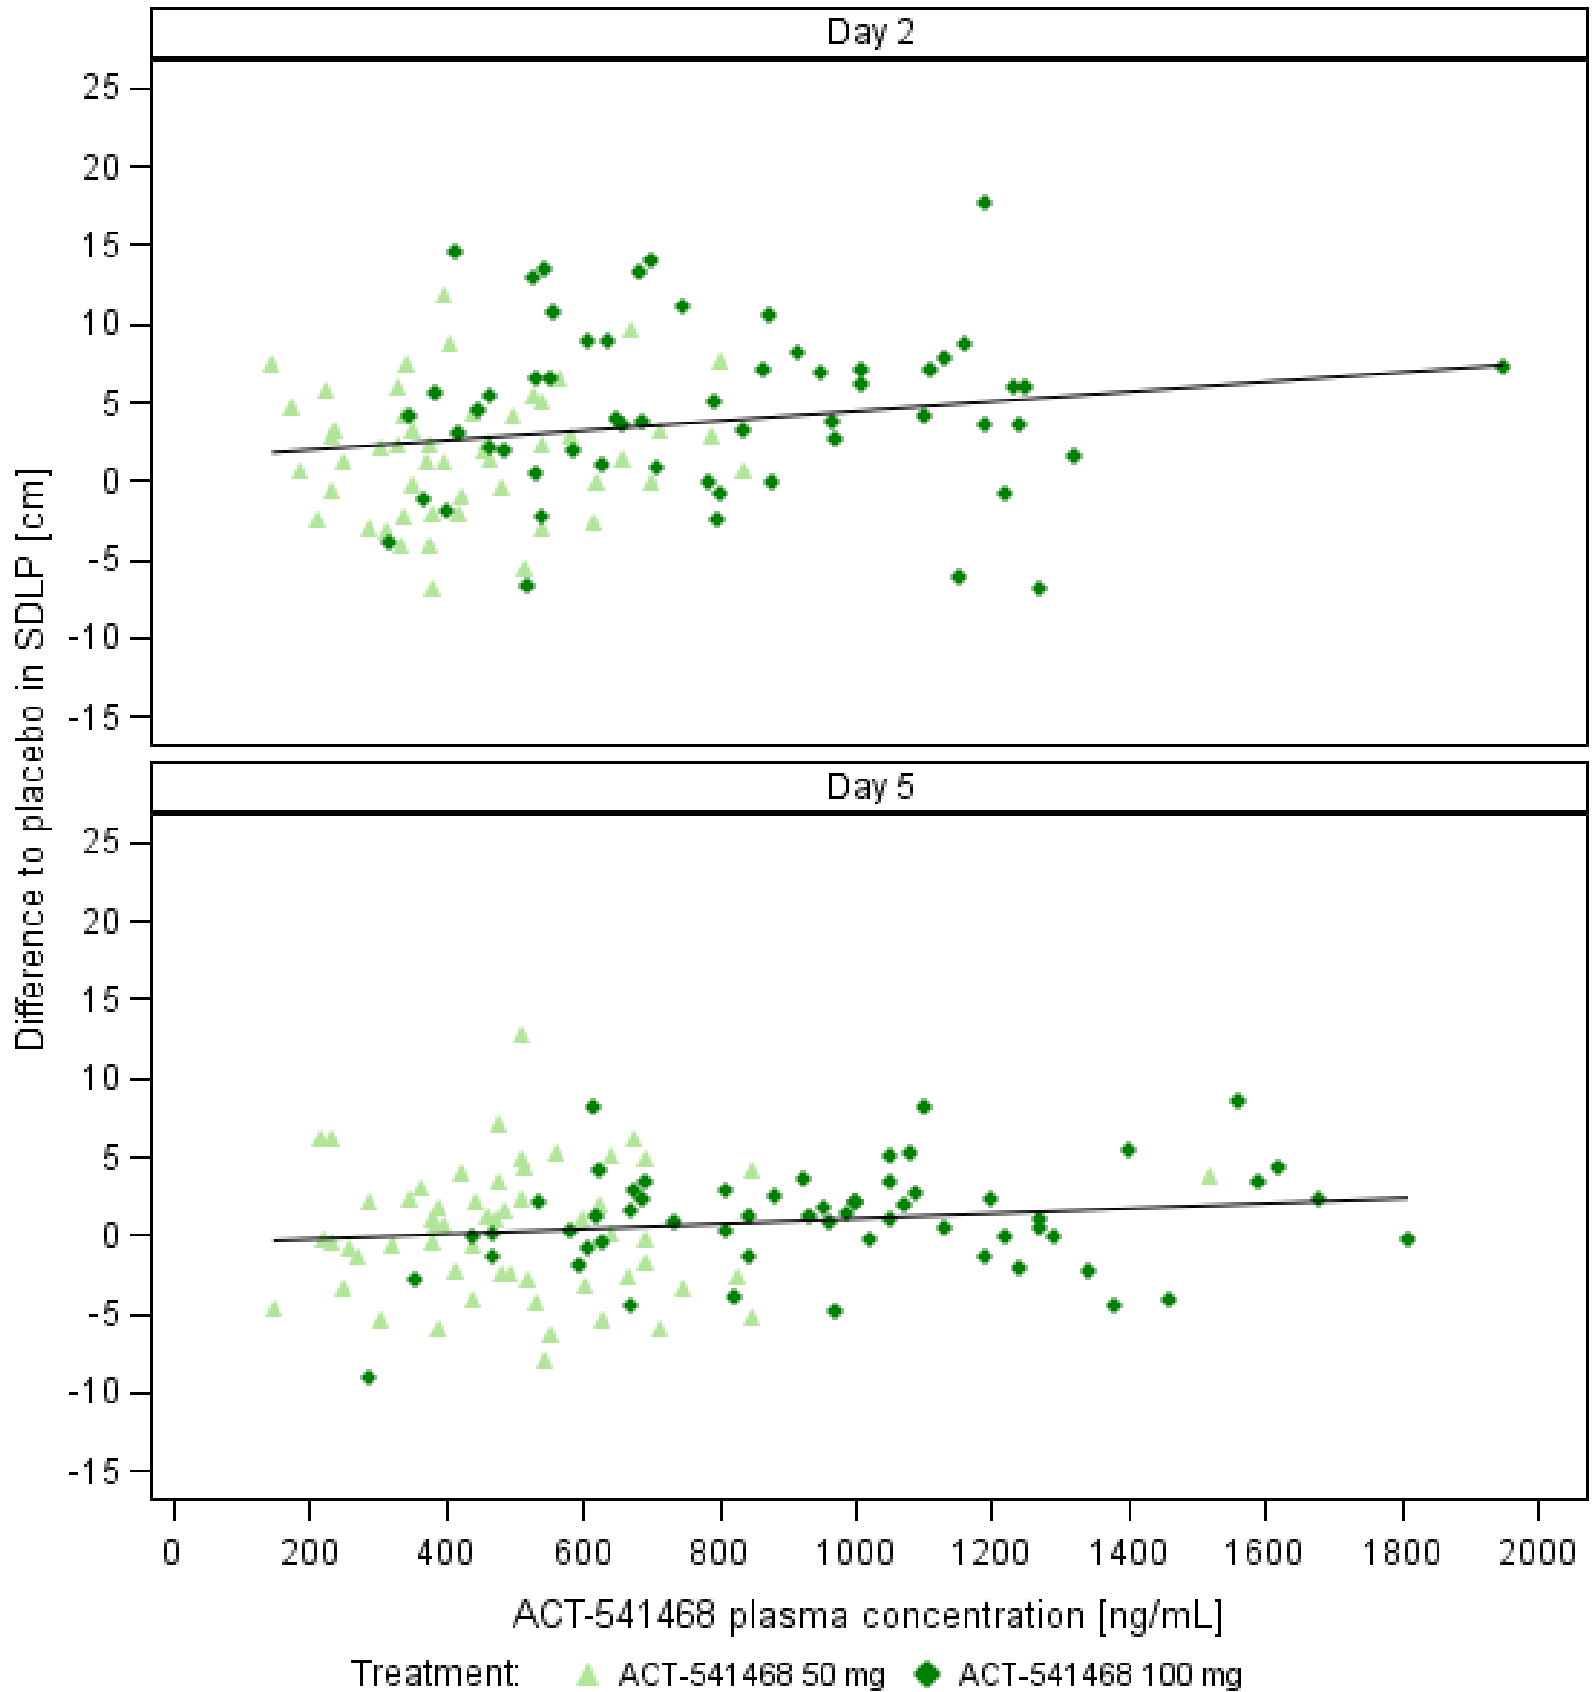

SDLP = standard deviation of the lateral position
