# Supplementary material for: Driving Performance after Bedtime Administration of Daridorexant, Assessed in a Sensitive Simulator
Source: PubMed Central journal article supplement — Clin Pharmacol Ther. 2022 Apr 20;111(6):1334–42. doi: 10.1002/cpt.2592 (PMC9320895; doi:10.1002/cpt.2592), 2022-04-20
Supplement: CPT-111-1334-s006.pdf [file CPT-111-1334-s006.pdf]

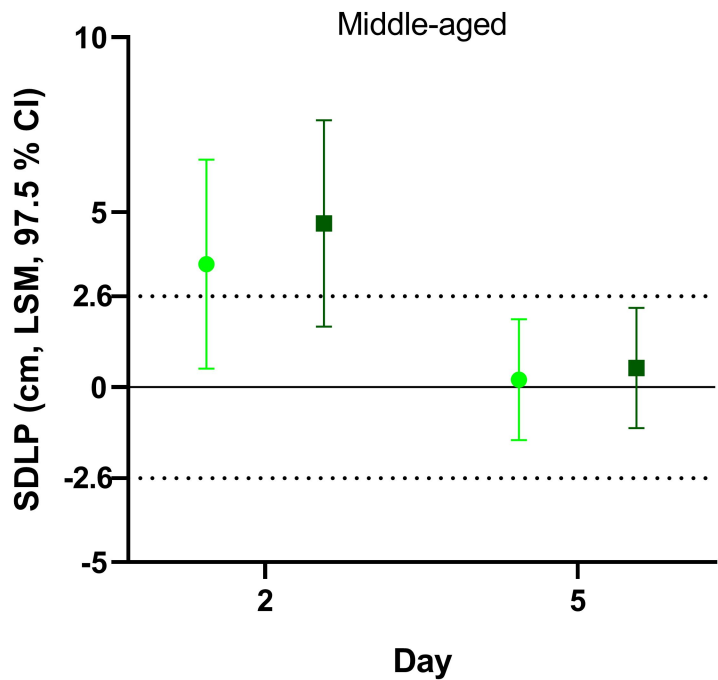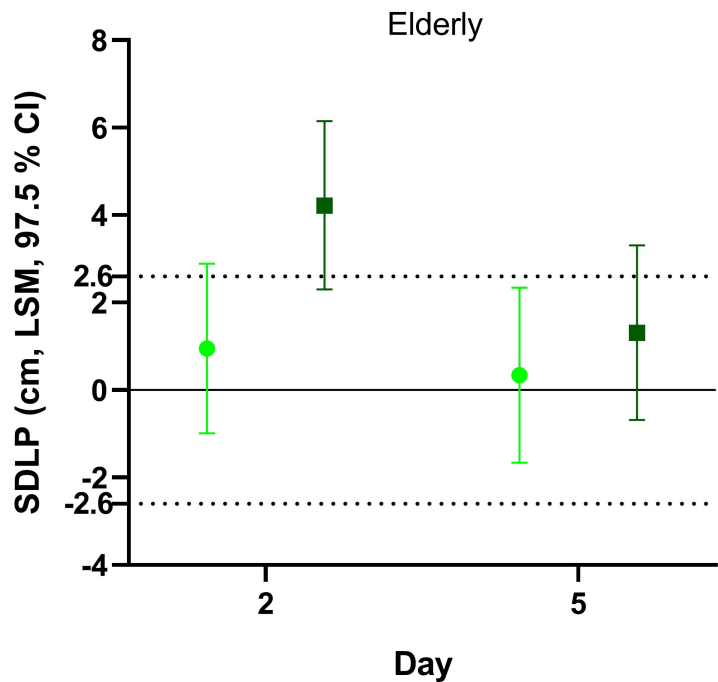

**Figure S3.** SDLP difference to placebo [cm] on Day 2 and 5, middle-aged and elderly subgroup separated (n=28-30)

● ACT-541468 50 mg ■ ACT-541468 100 mg

Data are LSM (97.5% CI). CI = confidence interval, LSM = least square mean, SDLP = standard deviation of the lateral position
