# Supplementary figures and images for: Driving Performance after Bedtime Administration of Daridorexant, Assessed in a Sensitive Simulator
Source: PubMed Central journal article supplement — Clin Pharmacol Ther. 2022 Apr 20;111(6):1334–42. doi: 10.1002/cpt.2592 (PMC9320895; doi:10.1002/cpt.2592), 2022-04-20

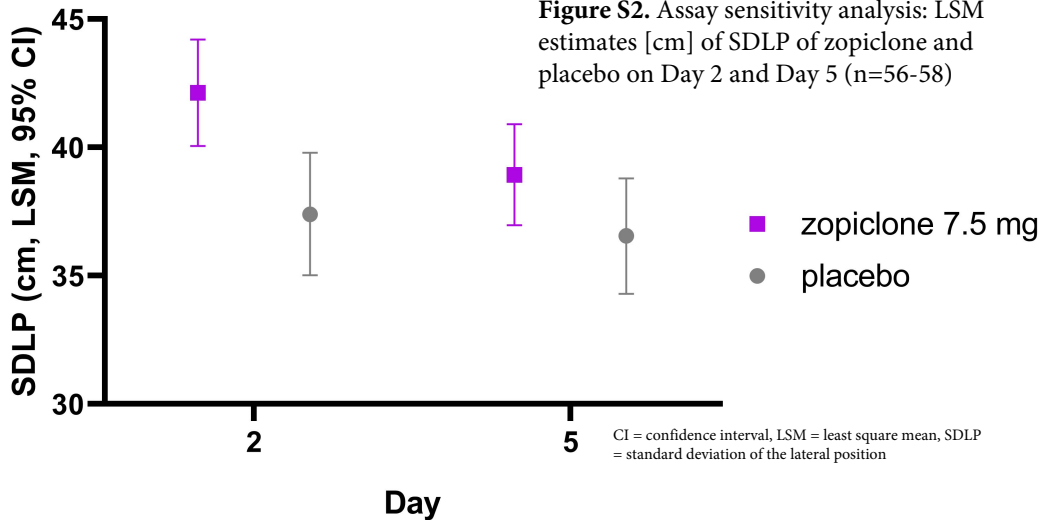

Supplement: CPT-111-1334-s001.pdf [file CPT-111-1334-s001.pdf]

**Figure S1** Testing strategy

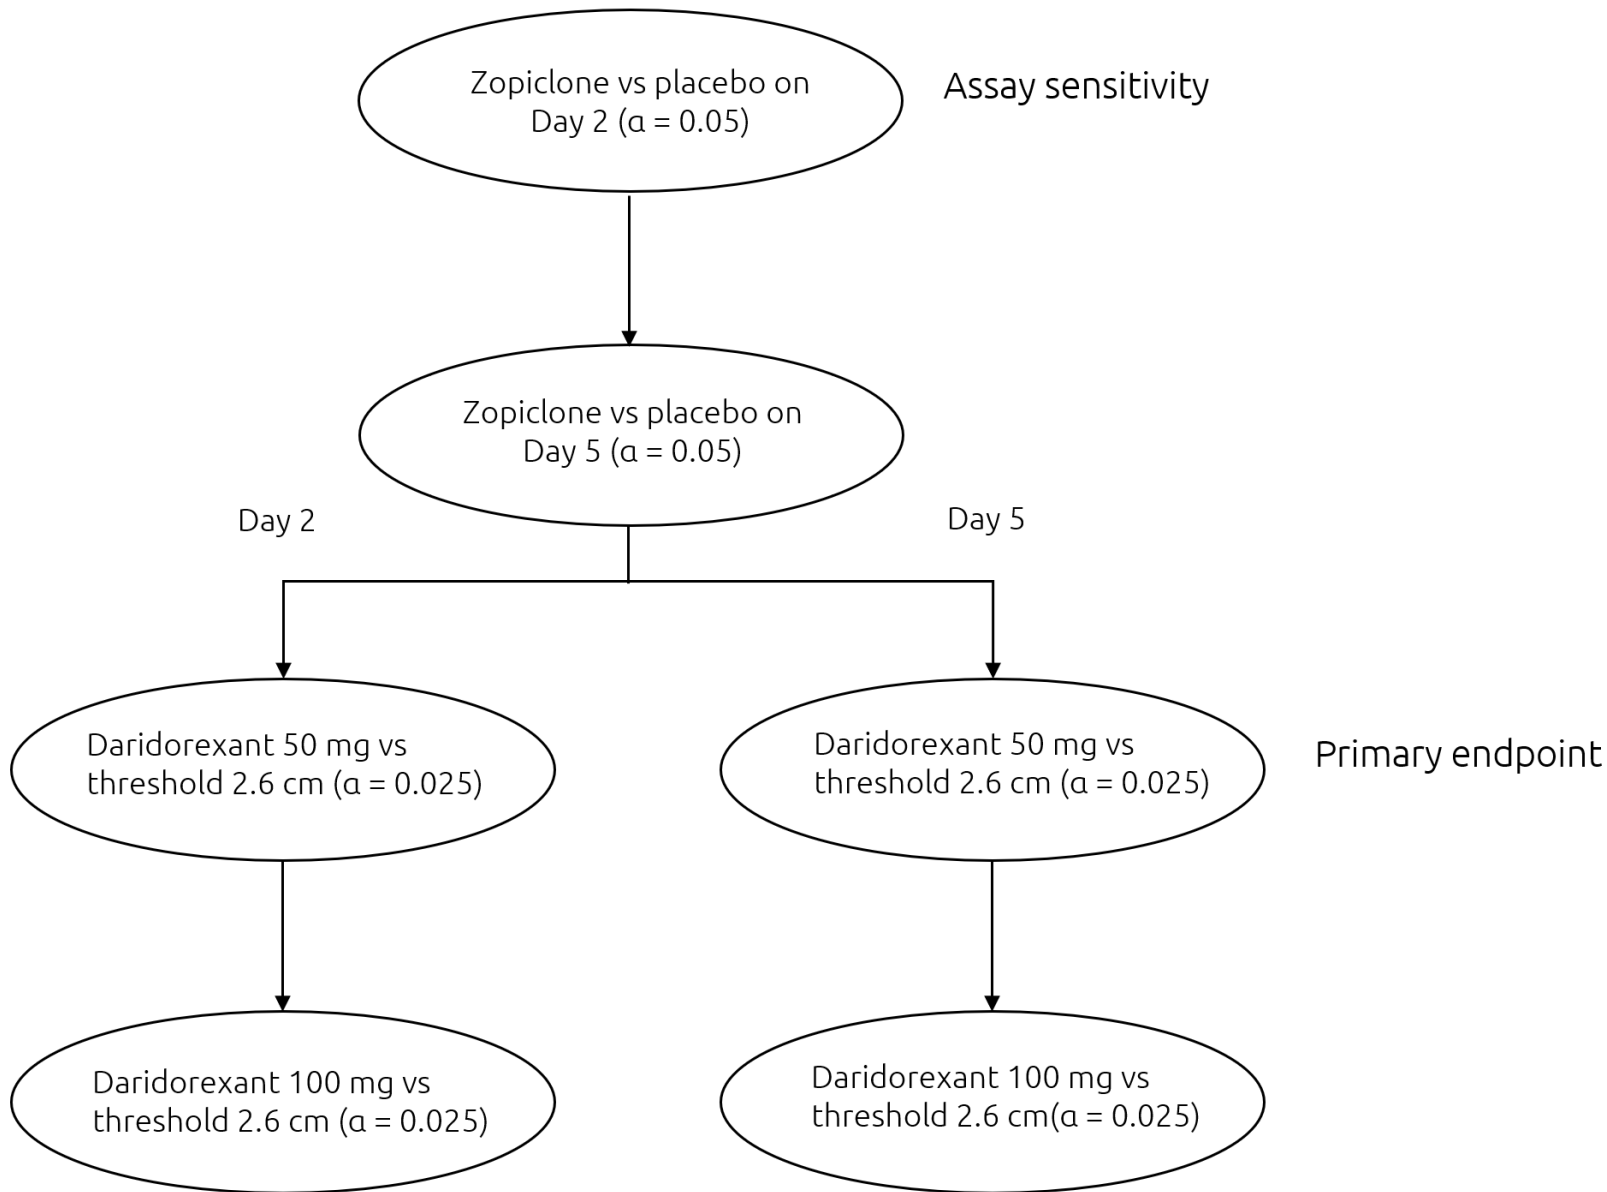

Supplement: CPT-111-1334-s003.pdf [file CPT-111-1334-s003.pdf]
